# Supplementary material
Source: publisher site journal article supplement (https://www.spandidos-publications.com/2379/downloadSupplementary)

Figure S1. Chest compressor. The placement of chest compressor was 2.8 cm above the xiphoid process. Chest compression was initiated at a rate of 200 beats/min and the depth of compressions (1-1.5 cm) was adjusted to maintain the mean aortic pressure >25 mmHg during resuscitation.

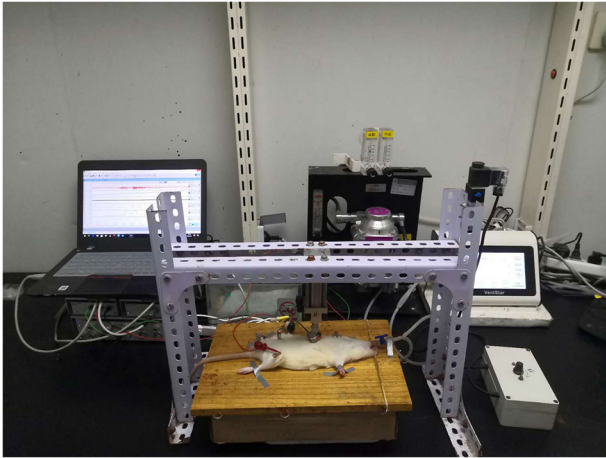

Supplement: Supplementary file 1 [file downloadSupplementary]
